# Supplementary material
Source: publisher site journal article supplement (https://www.spandidos-publications.com/2984/downloadSupplementary)

Figure S1. Semi-quantitative analysis of TrkB, TrkC, MEK and ERK expression in chemoresistant colon cancer cells. The intensity of each band was normalized by corresponding  $\beta$ -actin and/or total protein expressions, respectively. Data are presented as the mean  $\pm$  SD and analyzed using one-way ANOVA. (A) Comparison of each protein level with that of internal control ( $\beta$ -actin). (B) Comparison of phosphorylated protein level with that of total protein. \* $P < 0.05$ , \*\* $P < 0.01$ , ## $P < 0.005$  and ### $P < 0.001$  as indicated. Trk, tropomyosin receptor kinase; p, phosphorylated.

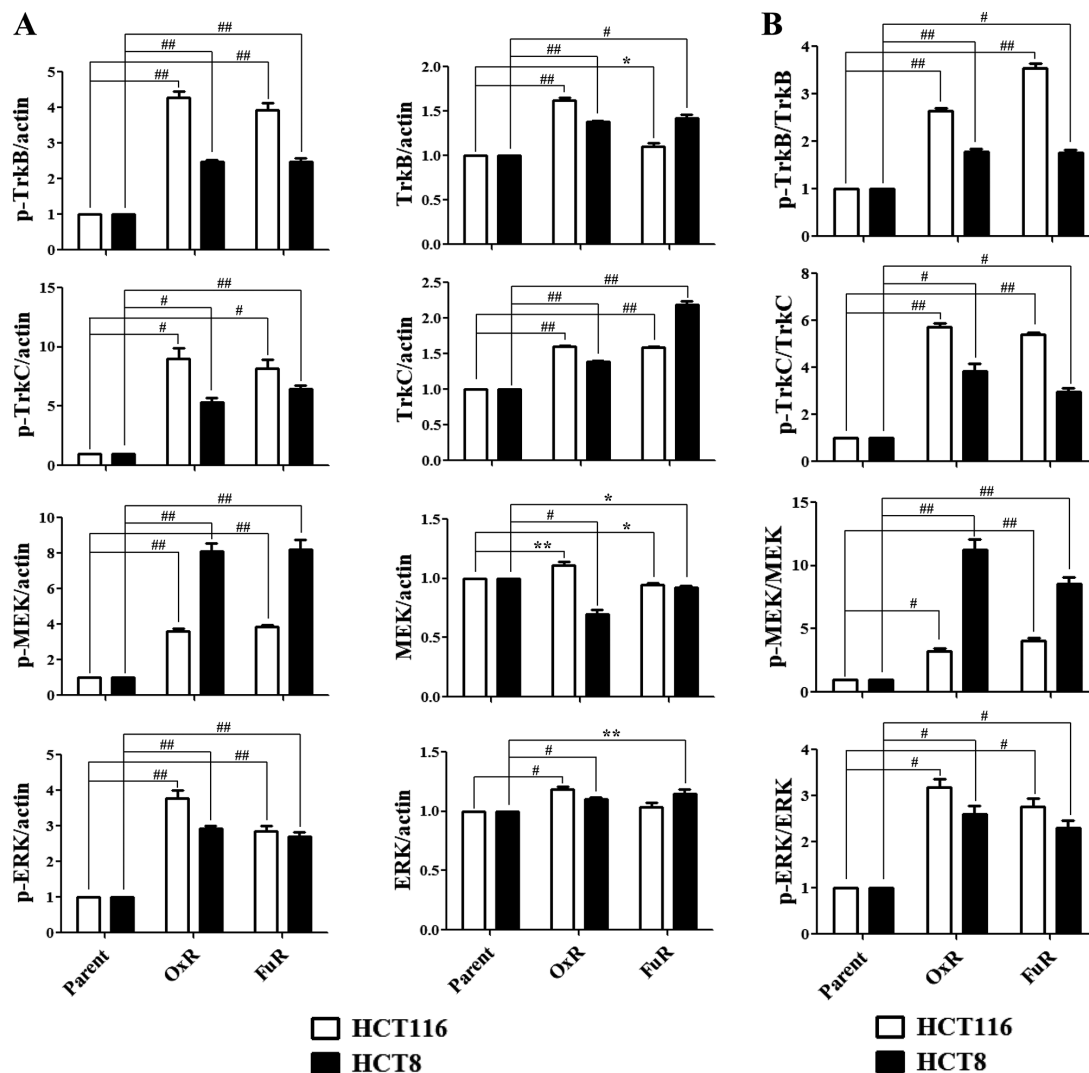

Figure S2. Effect of Trk inhibitor or si-HOXC6 on the viability of chemoresistant colon cancer cells. Cells were treated with the 2  $\mu$ M CH7057288 (Trk inhibitor) and 200 nM HOXC6-siRNA. At 24 h after treatment, cell viability was measured using a Cell Counting Kit-8 assay. Absorbance at 450 nm is presented. Data are presented as the mean  $\pm$  SD of three independent experiments. OxR and FuR (A) HCT116 and (B) HCT8 cells. Trk, tropomyosin receptor kinase; si or siRNA; small interfering RNA; Ctrl, control; OD, optical density; OxR, oxaliplatin resistant; FuR, 5-Fu-resistant.

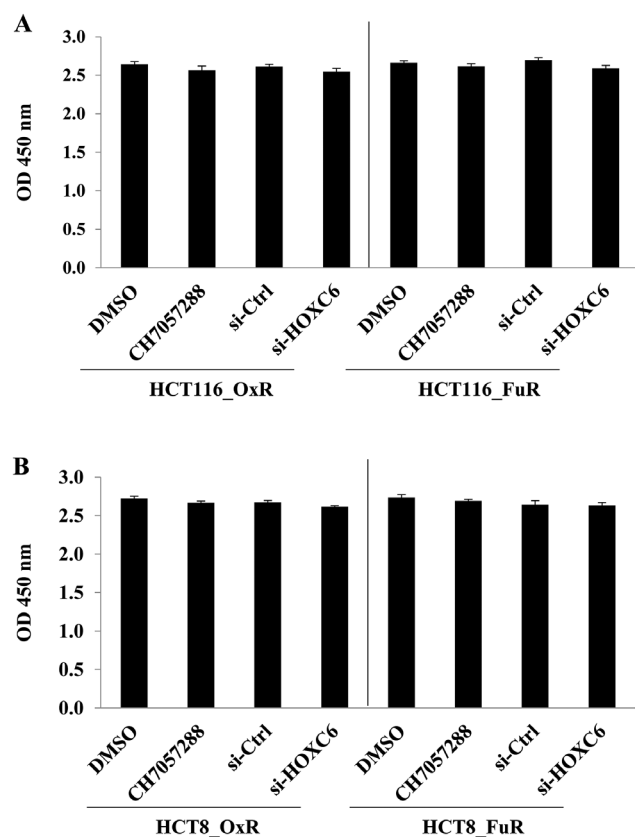

Figure S3. Semi-quantitative analysis of p-TrkB, TrkB, p-TrkC and TrkC expression in chemoresistant colon cancer cells after treatment with the Trk inhibitor. The intensity of each band was normalized by corresponding  $\beta$ -actin and/or total protein expressions, respectively. Data are presented as the mean  $\pm$  SD and analyzed using one-way ANOVA. (A) The effect of CH7057288 on the expression of p-TrkB, TrkB, p-TrkC and TrkC with comparisons made to that of (A) the internal control and (B) total protein as appropriate. <sup>#</sup>P<0.005 and <sup>##</sup>P<0.001 as indicated. p, phosphorylated; Trk, tropomyosin receptor kinase; OxR, oxaliplatin resistant; FuR, 5-Fu-resistant.

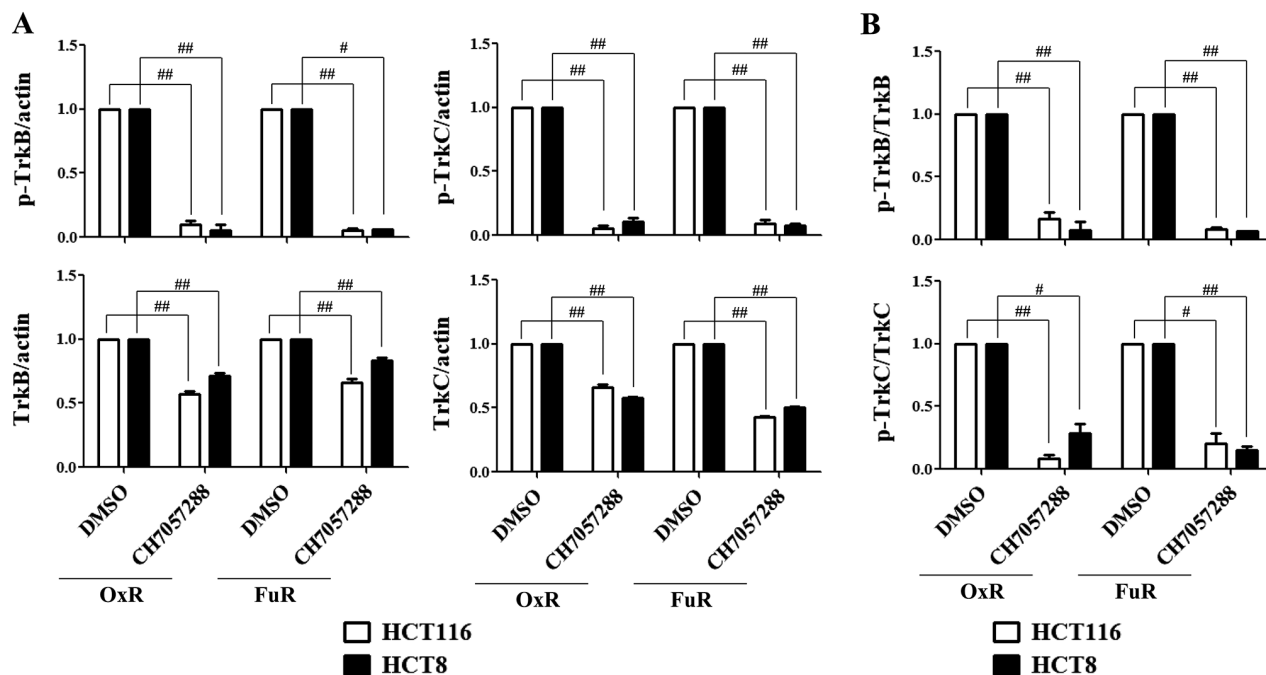

Supplement: Supplementary file 1 [file downloadSupplementary]
